# Supplementary material for: Comparative Morphological, Ultrastructural, and Molecular Studies of Four Cicadinae Species Using Exuvial Legs
Source: PubMed Central journal article supplement (PMC6681316; doi:10.3390/insects10070199), 2019-07-06
Supplement: insects-10-00199-s001.pdf [file insects-10-00199-s001.pdf]

**Table S1.** Exuvium information of specimen, collection locality and data, with accession number for each sample in this molecular study. Asterisked accession number are sequences obtained in this study.

| Sequence_ID      | Collection locality                            | Collection date | Voucher No   | Accession No. |
|------------------|------------------------------------------------|-----------------|--------------|---------------|
| CA-1_CO1         | Jijok-dong, Yuseong-gu, Daejeon, Korea         | 28-Jul-2018     | 2-19-0006-1  | MK807119*     |
| CA-2_CO1         | Jijok-dong, Yuseong-gu, Daejeon, Korea         | 28-Jul-2018     | 2-19-0006-3  | MK807120*     |
| CA-3_CO1         | Jijok-dong, Yuseong-gu, Daejeon, Korea         | 28-Jul-2018     | 2-19-0006-5  | MK807121*     |
| CA-4_CO1         | Jijok-dong, Yuseong-gu, Daejeon, Korea         | 28-Jul-2018     | 2-19-0006-6  | MK807122*     |
| CA-5_CO1         | Jijok-dong, Yuseong-gu, Daejeon, Korea         | 28-Jul-2018     | 2-19-0006-7  | MK807123*     |
| CA-6_CO1         | Jijok-dong, Yuseong-gu, Daejeon, Korea         | 28-Jul-2018     | 2-19-0006-9  | MK807124*     |
| CA-7_CO1         | Jijok-dong, Yuseong-gu, Daejeon, Korea         | 28-Jul-2018     | 2-19-0006-10 | MK807125*     |
| CA-8_CO1         | Jijok-dong, Yuseong-gu, Daejeon, Korea         | 28-Jul-2018     | 2-19-0006-11 | MK807126*     |
| CA-9_CO1         | Jijok-dong, Yuseong-gu, Daejeon, Korea         | 28-Jul-2018     | 2-19-0006-12 | MK807127*     |
| CA-10_CO1        | Jijok-dong, Yuseong-gu, Daejeon, Korea         | 28-Jul-2018     | 2-19-0006-13 | MK807128*     |
| CA-11_CO1        | Jijok-dong, Yuseong-gu, Daejeon, Korea         | 28-Jul-2018     | 2-19-0006-14 | MK807129*     |
| CA-12_CO1        | Jijok-dong, Yuseong-gu, Daejeon, Korea         | 28-Jul-2018     | 2-19-0006-15 | MK807130*     |
| CA-13_CO1        | Jijok-dong, Yuseong-gu, Daejeon, Korea         | 28-Jul-2018     | 2-19-0006-16 | MK807131*     |
| CA-14_CO1        | Jijok-dong, Yuseong-gu, Daejeon, Korea         | 28-Jul-2018     | 2-19-0006-17 | MK807132*     |
| <i>C. atrata</i> | -                                              | -               | -            | MG737717      |
| HM-1-CO1         | Cheolsan-dong, Gwangmyeong-si, Gyeonggi, Korea | 27-Jul-2018     | 2-19-0007-1  | MK807133*     |
| HM-2-CO1         | Cheolsan-dong, Gwangmyeong-si, Gyeonggi, Korea | 27-Jul-2018     | 2-19-0007-2  | MK807134*     |
| HM-3-CO1         | Cheolsan-dong, Gwangmyeong-si, Gyeonggi, Korea | 27-Jul-2018     | 2-19-0007-3  | MK807135*     |
| HM-4-CO1         | Cheolsan-dong, Gwangmyeong-si, Gyeonggi, Korea | 27-Jul-2018     | 2-19-0007-5  | MK807136*     |
| HM-5-CO1         | Cheolsan-dong, Gwangmyeong-si, Gyeonggi, Korea | 27-Jul-2018     | 2-19-0007-6  | MK807137*     |
| HM-6-CO1         | Cheolsan-dong, Gwangmyeong-si, Gyeonggi, Korea | 27-Jul-2018     | 2-19-0007-7  | MK807138*     |

|                          |                                                |             |                    |           |
|--------------------------|------------------------------------------------|-------------|--------------------|-----------|
| HM-7-CO1                 | Cheolsan-dong, Gwangmyeong-si, Gyeonggi, Korea | 27-Jul-2018 | 2-19-0007-8        | MK807139* |
| HM-8-CO1                 | Cheolsan-dong, Gwangmyeong-si, Gyeonggi, Korea | 27-Jul-2018 | 2-19-0007-9        | MK807140* |
| HM-9-CO1                 | Cheolsan-dong, Gwangmyeong-si, Gyeonggi, Korea | 27-Jul-2018 | 2-19-0007-10       | MK807141* |
| HM-10-CO1                | Cheolsan-dong, Gwangmyeong-si, Gyeonggi, Korea | 27-Jul-2018 | 2-19-0007-12       | MK807142* |
| HM-11-CO1                | Cheolsan-dong, Gwangmyeong-si, Gyeonggi, Korea | 27-Jul-2018 | 2-19-0007-13       | MK807143* |
| HM-12-CO1                | Cheolsan-dong, Gwangmyeong-si, Gyeonggi, Korea | 27-Jul-2018 | 2-19-0007-14       | MK807144* |
| HM-13-CO1                | Cheolsan-dong, Gwangmyeong-si, Gyeonggi, Korea | 27-Jul-2018 | 2-19-0007-15       | MK807145* |
| HM-14-CO1                | Cheolsan-dong, Gwangmyeong-si, Gyeonggi, Korea | 27-Jul-2018 | 2-19-0007-16       | MK807146* |
| HM-15-CO1                | Cheolsan-dong, Gwangmyeong-si, Gyeonggi, Korea | 27-Jul-2018 | 2-19-0007-17       | MK807147* |
| HM-16-CO1                | Cheolsan-dong, Gwangmyeong-si, Gyeonggi, Korea | 27-Jul-2018 | 2-19-0007-18       | MK807148* |
| HM-17-CO1                | Cheolsan-dong, Gwangmyeong-si, Gyeonggi, Korea | 27-Jul-2018 | 2-19-0007-19       | MK807149* |
| <i>H. maculaticollis</i> | -                                              | -           | -                  | KY860344  |
| MO-1-CO1                 | Ganghwa-eup, Ganghwa-gun, Incheon, Korea       | 31-Jul-2018 | MBC_KIOM-2018-MO-1 | MK807159* |
| MO-2-CO1                 | Ganghwa-eup, Ganghwa-gun, Incheon, Korea       | 31-Jul-2018 | MBC_KIOM-2018-MO-2 | MK807160* |
| MO-3-CO1                 | Jijok-dong, Yuseong-gu, Daejeon, Korea         | 18-Jul-2018 | 2-19-0131-1        | MK807161* |
| MO-4-CO1                 | Jijok-dong, Yuseong-gu, Daejeon, Korea         | 18-Jul-2018 | 2-19-0131-2        | MK807162* |
| MO-5-CO1                 | Ganghwa-eup, Ganghwa-gun, Incheon, Korea       | 31-Jul-2018 | MBC_KIOM-2018-MO-3 | MK807163* |
| MO-6-CO1                 | Ganghwa-eup, Ganghwa-gun, Incheon, Korea       | 31-Jul-2018 | MBC_KIOM-2018-MO-4 | MK807164* |
| MO-7-CO1                 | Jijok-dong, Yuseong-gu, Daejeon, Korea         | 18-Jul-2018 | 2-19-0131-3        | MK807165* |
| MO-8-CO1                 | Jijok-dong, Yuseong-gu, Daejeon, Korea         | 18-Jul-2018 | 2-19-0131-4        | MK807166* |
| <i>M. opalifera</i>      | -                                              | -           | -                  | GQ527088  |
| PK-1-CO1                 | Yeongdeungpo-dong, Seoul, Korea                | 29-Jul-2018 | MBC_KIOM-2018-PK-2 | MK807150* |
| PK-2-CO1                 | Jeongeup, Jeonbuk, Korea                       | 31-Jul-2018 | 2-19-0130-1        | MK807151* |
| PK-3-CO1                 | Jeongeup, Jeonbuk, Korea                       | 31-Jul-2018 | 2-19-0130-2        | MK807152* |
| PK-4-CO1                 | Yeongdeungpo-dong, Seoul, Korea                | 29-Jul-2018 | MBC_KIOM-2018-PK-6 | MK807153* |

|                        |                                 |             |                     |           |
|------------------------|---------------------------------|-------------|---------------------|-----------|
| PK-5-CO1               | Yeongdeungpo-dong, Seoul, Korea | 29-Jul-2018 | MBC_KIOM-2018-PK-8  | MK807154* |
| PK-6-CO1               | Yeongdeungpo-dong, Seoul, Korea | 29-Jul-2018 | MBC_KIOM-2018-PK-9  | MK807155* |
| PK-7-CO1               | Yeongdeungpo-dong, Seoul, Korea | 29-Jul-2018 | MBC_KIOM-2018-PK-10 | MK807156* |
| PK-8-CO1               | Yeongdeungpo-dong, Seoul, Korea | 29-Jul-2018 | MBC_KIOM-2018-PK-12 | MK807157* |
| PK-9-CO1               | Yeongdeungpo-dong, Seoul, Korea | 29-Jul-2018 | MBC_KIOM-2018-PK-14 | MK807158* |
| <i>P. kaempferi</i>    | -                               | -           | -                   | MG737816  |
| † <i>A. cardamines</i> | -                               | -           | -                   | MH420365  |

†, outgroup; CA, *Cryptotympana atrata*; HM, *Hyalessa maculaticollis*; MO, *Meimuna opalifera*; PK, *Platypleura kaempferi*.
